# Supplementary material
Source: publisher figshare collection journal article supplement (https://acs.figshare.com/ndownloader/files/16684592)
Supplement: Supplementary file 1 [file 16684592]

# Supporting Information for *Disentangling Polymer Network and Hydration Water Dynamics in pHEMA Physical and Chemical Hydrogels*

Daria Noferini,<sup>§,∇</sup> Antonio Faraone,<sup>‡</sup> Marta Rossi,<sup>§</sup> Eugene Mamontov,<sup>⊥</sup> Emiliano Fratini,<sup>\*,§</sup> and Piero Baglioni.<sup>§</sup>

<sup>§</sup>Department of Chemistry “Ugo Schiff” and CSGI, University of Florence, Via della Lastruccia 3 - 50019 Sesto Fiorentino, Florence, Italy.

<sup>∇</sup>Current address: Forschungszentrum Jülich GmbH, JCNS at Heinz Maier-Leibnitz Zentrum, Lichtenberstraße 1, 85747, Garching, Germany.

<sup>‡</sup>NIST Center for Neutron Research, Gaithersburg, MD 20899-6100, USA, USA.

<sup>⊥</sup>Spallation Neutron Source, Oak Ridge National Laboratory, Oak Ridge, TN, 37831, USA.

\*Corresponding author. E-mail: emiliano.fratini@unifi.it

## 1 Polymer network EISF fitting parameters

The elastic incoherent structure factor related to the H-atoms of the polymer network,  $EISF(Q)$ , was analysed according to Eq. 14 and Eq. 15. Such equations represent the hypothesis that the observed quasi-elastic broadening reflects only the motion of the side-chain or to both the side-chain and the methyl group, respectively (see text in the paper and Figure 5). In Figure S1, we report the weights of the different parts of the polymer chain, as obtained from the fit parameters  $A$  and  $B$  of Eq. 14 and Eq. 15, and the dimension of the region of space explored by the side-chain and the backbone,  $R_{SC}$  and  $R_B$ , respectively. All the parameters are obtained from the fits shown in Figure 5. The expected values on the basis of stoichiometric or geometric considerations (dashed lines) are also reported for comparison.

## 2 Jump-diffusion models

For the fit of the quasi-elastic broadening, we used the models developed by Chudley and Elliot (CEM) [S1], Singwi and Sjölander (SSM) [S2], and Hall and Ross (HRM) [S3]. Such models assume a diffusive motion *via* successive jumps. In between two jumps, the particle rests on a given site for a residence time  $\tau$ .

In the CEM, the jump distance  $l_{CEM}$  is a constant and the corresponding half width at half maximum of the Lorentzian quasi-elastic component is given by

$$\frac{\Gamma}{2} = \frac{\hbar}{\tau} \left( 1 - \frac{\sin(Ql_{CEM})}{Ql_{CEM}} \right), \quad (1)$$

In the SSM, the jump distance  $\rho(r)$  is exponentially distributed,

$$\rho(r) = \frac{r}{r_0^2} \exp\left(-\frac{r}{r_0}\right), \quad (2)$$

and the broadening is given by

$$\frac{\Gamma}{2} = \frac{\hbar}{6\tau} \frac{Q^2 l_{SSM}^2}{1 + \frac{Q^2 l_{SSM}^2}{6}}, \quad (3)$$

where  $l_{SSM}^2$  is the mean square jump length, which is equal to  $\int_0^\infty r^2 \rho(r) dr = 6r_0^2$ .

In the HRM, the jump distance is defined by a Gaussian distribution,

$$\rho(r) = \frac{2r^2}{r_0^3 (2\pi)^{1/2} \exp\left(-\frac{r^2}{2r_0^2}\right)}, \quad (4)$$

and the broadening is given by

$$\frac{\Gamma}{2} = \frac{\hbar}{\tau} \left[ 1 - \exp\left(-\frac{Q^2 l_{HRM}^2}{6}\right) \right]. \quad (5)$$

The mean square jump length for this model,  $l_{HRM}^2$ , is equal to  $\int_0^\infty r^2 \rho(r) dr = 3r_0^2$ .

### 2.1 Jump-diffusion fit parameters

The residence times and jump lengths obtained by fitting the quasi-elastic broadening using the CEM, SSM and HRM are given in Tab. S1 and Tab. S2, respectively.

The residence times and the diffusion coefficients were fitted according to an Arrhenius law (see paper, Figure 10). Table S3 lists the derived activation energies and high temperature limits.

## 3 DSC thermograms

Figures S2 and S3 show the most representative DSC heating scans for the pHEMA chemical and physical hydrogels.

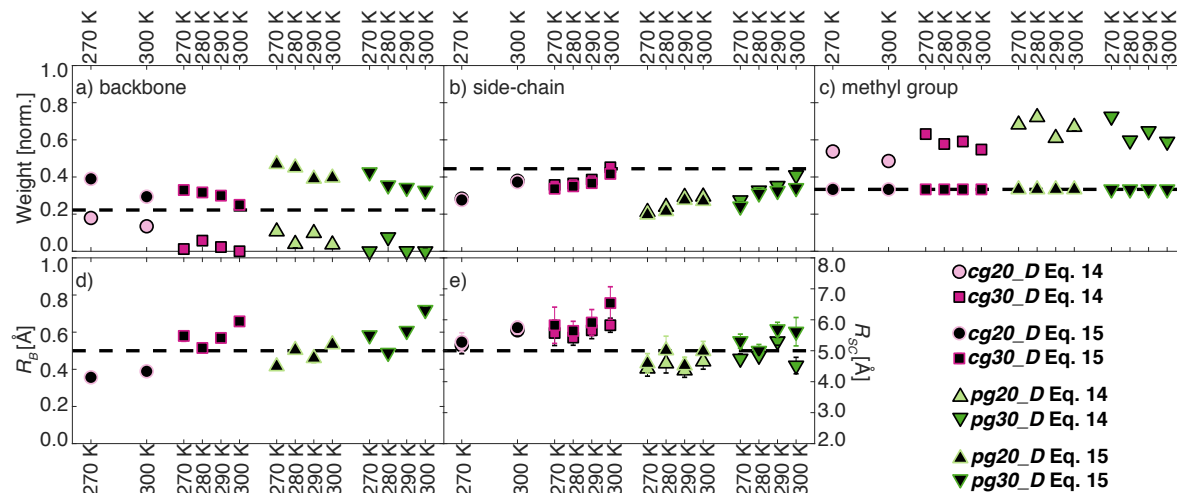

**Fig. S1** Weights of the different parts of the polymer chain: a) backbone, b) side-chain, and c) methyl group. In d) and e), there are shown the regions of space explored by the backbone and the side-chain, respectively. All the parameters are obtained from the fits shown in Figure 5 in the paper and Eq. 14 and 15. Dashed lines represent the expected values on the basis of stoichiometric or geometric considerations. When not visible, error bars are within the symbols.

|               | CEM      |          |          |          | SSM      |          |          |          | HRM      |          |          |          |
|---------------|----------|----------|----------|----------|----------|----------|----------|----------|----------|----------|----------|----------|
|               | 270K     | 280K     | 290K     | 300K     | 270K     | 280K     | 290K     | 300K     | 270K     | 280K     | 290K     | 300K     |
| <i>cg20_w</i> | -        | -        | -        | 0.09(3)  | -        | -        | -        | 0.03(1)  | -        | -        | -        | 0.06(2)  |
| <i>cg30_w</i> | 0.061(3) | 0.051(3) | 0.047(3) | 0.041(2) | 0.037(3) | 0.030(2) | 0.028(2) | 0.024(2) | 0.049(3) | 0.040(3) | 0.037(2) | 0.032(2) |
| <i>pg20_w</i> | 0.099(3) | 0.081(2) | 0.072(2) | 0.063(1) | 0.062(3) | 0.055(2) | 0.050(3) | 0.045(3) | 0.079(3) | 0.067(1) | 0.060(2) | 0.053(2) |
| <i>pg30_w</i> | 0.065(3) | 0.056(2) | 0.050(2) | 0.045(2) | 0.036(3) | 0.033(1) | 0.030(2) | 0.028(2) | 0.049(3) | 0.044(1) | 0.039(1) | 0.036(1) |

**Tab. S1** Residence times  $\tau$  (in ns) obtained by fitting  $\frac{\Gamma}{2}$  according to Eq. (1), (3), and (5).

|               | $l_{CEM}$ |        |        |         | $l_{SSM}$ |        |        |        | $l_{HRM}$ |        |        |        |
|---------------|-----------|--------|--------|---------|-----------|--------|--------|--------|-----------|--------|--------|--------|
|               | 270K      | 280K   | 290K   | 300K    | 270K      | 280K   | 290K   | 300K   | 270K      | 280K   | 290K   | 300K   |
| <i>cg20_w</i> | -         | -      | -      | 2.4(4)  | -         | -      | -      | 1.5(4) | -         | -      | -      | 1.9(4) |
| <i>cg30_w</i> | 3.9(2)    | 3.9(2) | 3.9(2) | 4.1(2)  | 3.5(3)    | 3.4(2) | 3.5(2) | 3.6(2) | 3.7(2)    | 3.6(2) | 3.7(2) | 3.8(2) |
| <i>pg20_w</i> | 3.7(1)    | 4.0(1) | 4.1(1) | 4.25(9) | 3.6(2)    | 4.1(2) | 4.5(5) | 4.7(6) | 3.6(1)    | 4.0(1) | 4.2(2) | 4.3(3) |
| <i>pg30_w</i> | 3.6(1)    | 3.9(1) | 4.1(1) | 4.3(1)  | 2.9(2)    | 3.3(1) | 3.6(2) | 3.9(3) | 3.2(1)    | 3.6(1) | 3.8(1) | 4.1(1) |

**Tab. S2** Jump lengths (in Å) obtained by fitting  $\frac{\Gamma}{2}$  according to Eq. (1), (3), and (5).

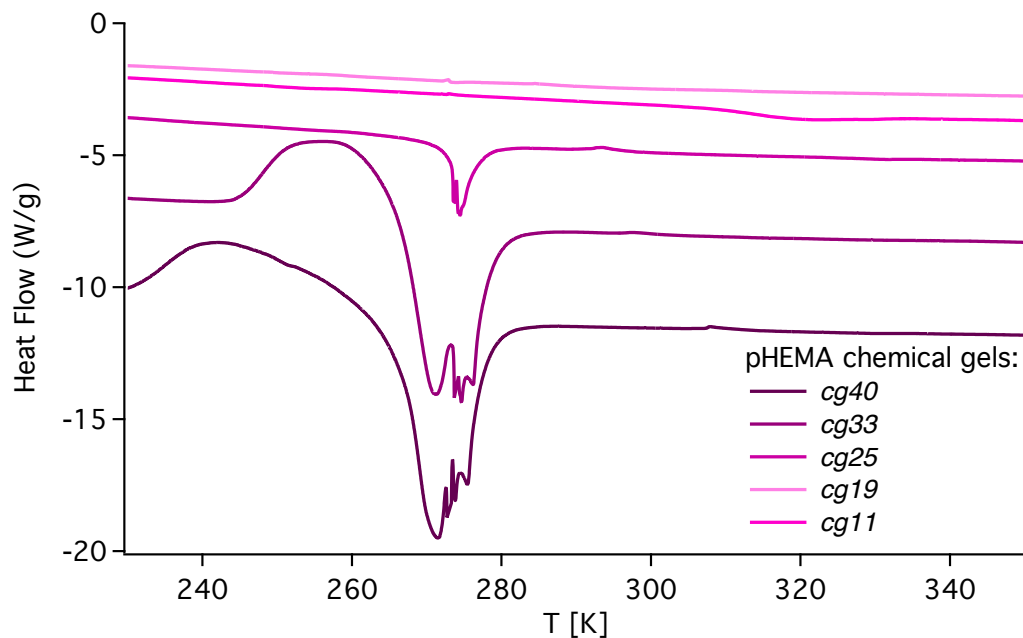

**Fig. S2** DSC heating scans representative of water melting in chemical hydrogels with 10 to 40 % water content. Curves are offset along the y-axis for the sake of clarity.

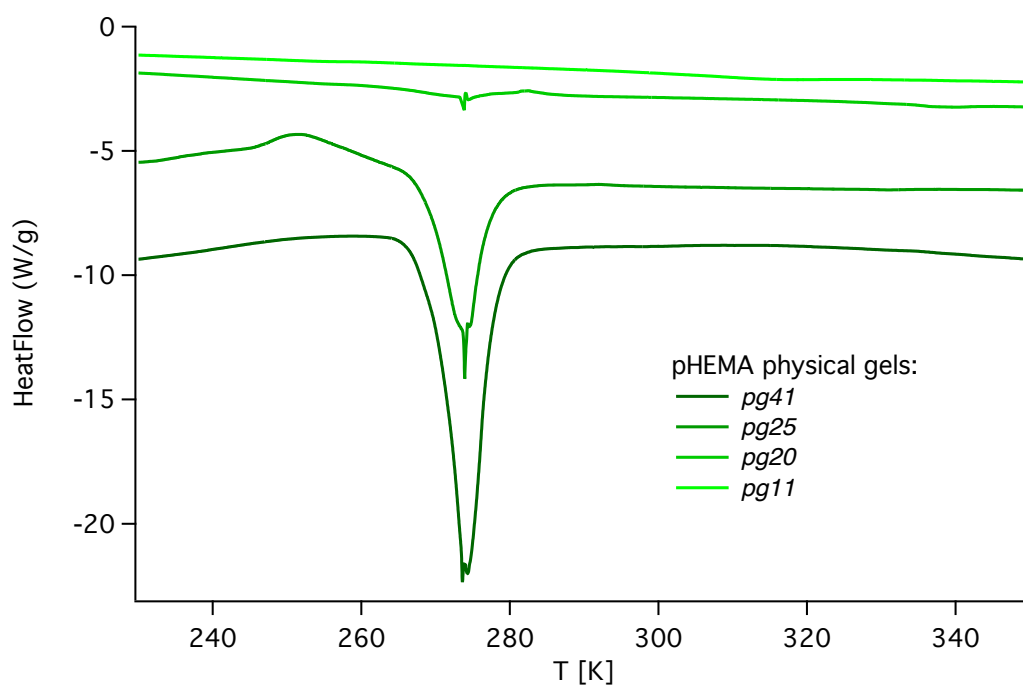

**Fig. S3** DSC heating scans representative of water melting in physical hydrogels with 10 to 40 % water content. Curves are offset along the y-axis for the sake of clarity.

---

|                     | $\tau_0$<br>[ps] | $E_\tau$<br>[eV] | $D_0$<br>[10 <sup>-3</sup> cm <sup>2</sup> s <sup>-1</sup> ] | $E_D$<br>[eV] |
|---------------------|------------------|------------------|--------------------------------------------------------------|---------------|
| <i>pg20_w</i> (CEM) | 1.5(5)           | -0.097(8)        | 2(1)                                                         | 0.15(2)       |
| <i>pg30_w</i> (SSM) | 2.5(4)           | -0.062(4)        | 12(6)                                                        | 0.18(1)       |
| <i>pg30_w</i> (HRM) | 2.0(2)           | -0.075(3)        | 6(2)                                                         | 0.17(1)       |
| <i>cg30_w</i> (SSM) | 0.6(2)           | -0.09(1)         | 0.5(2)                                                       | 0.11(1)       |
| <i>cg30_w</i> (HRM) | 0.9(3)           | -0.092(7)        | 0.5(2)                                                       | 0.11(1)       |

**Tab. S3** Activation energies and high temperature limits for residence times and diffusion coefficients derived by Arrhenius law fits.

### Note

Uncertainties and error bars represent one standard deviation.

### References

S1 Chudley, C. T.; Elliott, R. J. Neutron Scattering from a Liquid on a Jump Diffusion Model. *Proc. Phys. Soc.* **1961**, *77*, 353–361.

S2 Singwi, K. S.; Sjölander, A. Diffusive Motions in Water and Cold Neutron Scattering. *Phys. Rev.*, **1960**, *119*, 863–871.

S3 Hall, P. L.; Ross, D. K. Incoherent Neutron Scattering Functions for Random Jump Diffusion in Bounded and Infinite Media. *Mol. Phys.* **1981**, *42*, 673–682.
